# Supplementary material for: Home-Based Care Needs of Older Adult Stroke Survivors in Nigeria: A Qualitative Study of Stakeholders’ Perspectives
Source: Research Square preprint supplement (doi:10.21203/rs.3.rs-7507275/v1), 2025-10-30
Supplement: Supplementary file 1 [file e30648c7f8f343279a2e9747.docx]

**Table 1: Socio-demographic characteristics (N=34)**

| Socio-demographic (N=34) | No | % |
| --- | --- | --- |
| **Age*** |  |  |
| 22-34 | 7 | 20.6 |
| 35-59 | 20 | 58.8 |
| 60 and above | 7 | 20.6 |
| **Gender** |  |  |
| Male | 15 | 44.1 |
| Female | 19 | 55.9 |
| **Marital Status** |  |  |
| Single | 6 | 17.6 |
| Married | 26 | 76.5 |
| **Educational Qualification (n=26)** |  |  |
| No formal | 2 | 7.7 |
| Primary | 3 | 11.5 |
| Secondary | 8 | 30.8 |
| Tertiary | 13 | 50.0 |
| **Religion**  Christianity  Islamic  Traditional | 20  12  2 | 56.9  43.1  5.9 |
| **Relationship with Patients** |  |  |
| Son | 7 | 38.9 |
| Daughter  Wife | 6  5 | 33.3  27.3 |
| **Ethnicity** |  |  |
| Yoruba | 32 | 94.1 |
| Igbo  South-South | 1  1 | 2.9  2.9 |
| **Duration of care given (months) (n=18)**** |  |  |
| 1-23 | 13 | 72.2 |
| 24-48  49 and above | 4  1 | 22.2  5.6 |
| **Patients age (Years) (n=18)***** |  |  |
| 60-70 | 32 | 94.1 |

**Participants mean age 47.53±14.0; **Mean duration of care 16.11±17.8; ***Patients mean age 69.7±7.8.*
